# Supplementary material for: Broadband rotational spectroscopy oftrans3-pentenenitrile and 4-pentenenitrile
Source: Royal Society of Chemistry journal article supplement (doi:10.1039/c9cp04328d), 2019-01-01
Supplement: c9cp04328d1.pdf [file c9cp04328d1.pdf]

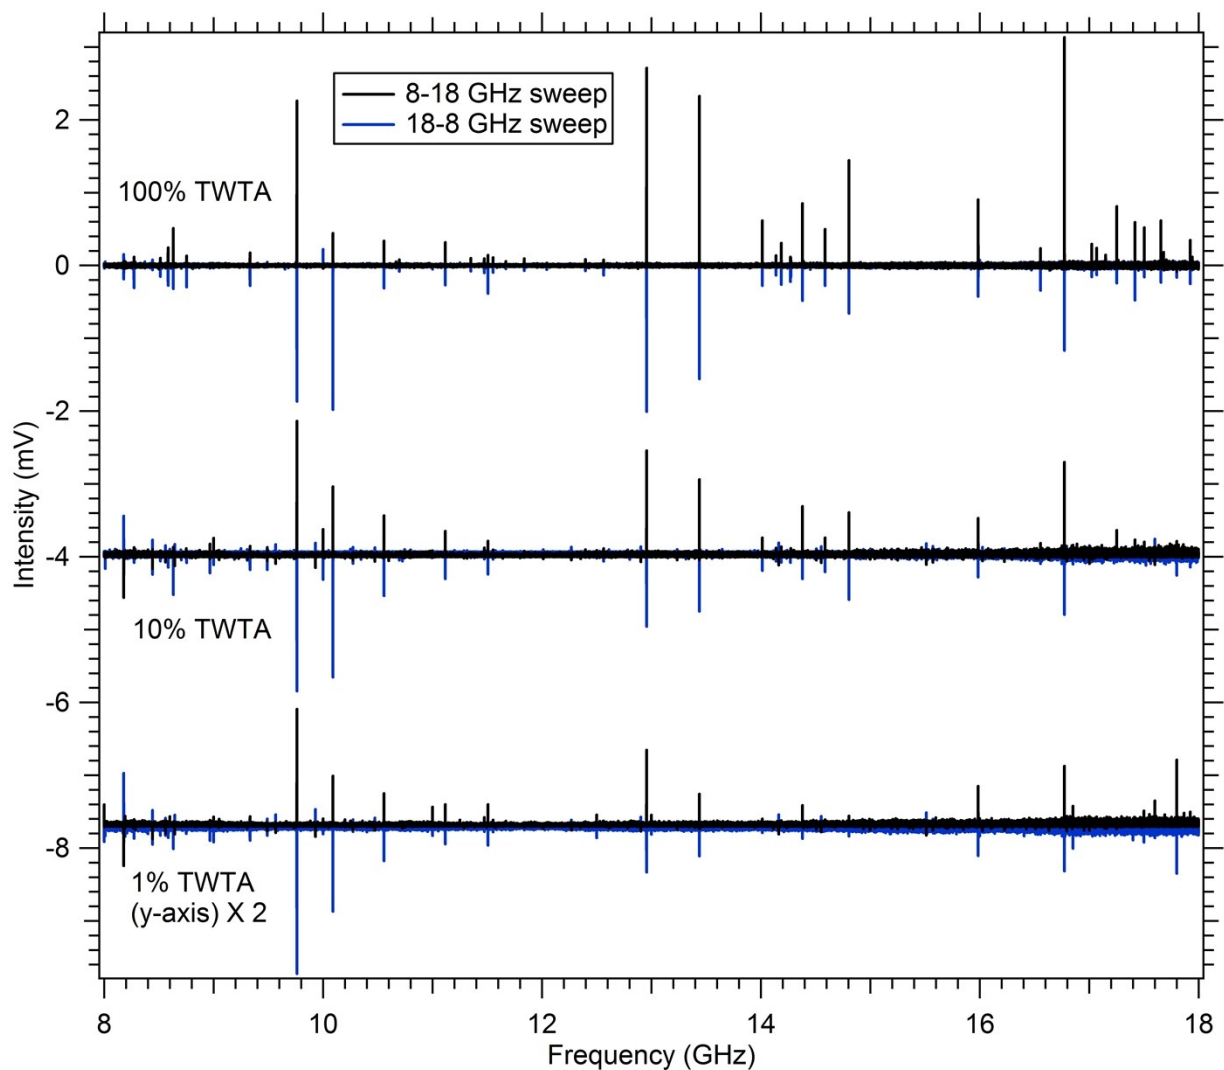

**Figure S1:** Comparison of two broadband microwave spectra for 3-PN recorded in the rapid adiabatic passage regime with 100%, 10% and 1% power on the TWTA. The spectrum recorded while sweeping 8  $\rightarrow$  18 GHz sweep (black trace) and the corresponding spectrum with an 18  $\rightarrow$  8 GHz sweep (blue trace). Note that with 100% power of TWTA the distortions in the two spectra with intensities of transitions at the end of each scan enhanced unlike in case of 10% and 1% power of the TWTA.

**Table S1:** Linelist of *syn* 3-pentenenitrile A-states from SPFIT.<sup>1</sup>

| J up | Ka up | Kc up | F up | J low | Ka low | Kc low | F low | Observed (MHz) | Calculated (MHz) |
|------|-------|-------|------|-------|--------|--------|-------|----------------|------------------|
| 4    | 1     | 3     | 3    | 4     | 0      | 4      | 3     | 8272.76563     | 8272.72159       |
| 4    | 1     | 3     | 5    | 4     | 0      | 4      | 5     | 8272.9375      | 8272.94668       |
| 4    | 1     | 3     | 4    | 4     | 0      | 4      | 4     | 8273.8125      | 8273.81765       |
| 4    | 0     | 4     | 3    | 3     | 1      | 3      | 2     | 8583.92188     | 8583.93456       |
| 4    | 0     | 4     | 5    | 3     | 1      | 3      | 4     | 8584.14063     | 8584.14642       |
| 4    | 0     | 4     | 4    | 3     | 1      | 3      | 3     | 8584.71875     | 8584.72988       |
| 5    | 1     | 4     | 4    | 5     | 0      | 5      | 4     | 9332.48438     | 9332.47528       |
| 5    | 1     | 4     | 6    | 5     | 0      | 5      | 6     | 9332.65625     | 9332.66721       |
| 5    | 1     | 4     | 5    | 5     | 0      | 5      | 5     | 9333.625       | 9333.62475       |
| 1    | 1     | 1     | 1    | 0     | 0      | 0      | 1     | 9760.53125     | 9760.54345       |
| 1    | 1     | 1     | 2    | 0     | 0      | 0      | 1     | 9761.23438     | 9761.23561       |
| 1    | 1     | 1     | 0    | 0     | 0      | 0      | 1     | 9762.26563     | 9762.26571       |
| 3    | 1     | 3     | 3    | 2     | 1      | 2      | 3     | 10089.32812    | 10089.32285      |
| 3    | 1     | 3     | 4    | 2     | 1      | 2      | 3     | 10089.98438    | 10089.99676      |
| 3    | 1     | 3     | 2    | 2     | 1      | 2      | 2     | 10090.89062    | 10090.89169      |
| 3    | 0     | 3     | 4    | 2     | 0      | 2      | 3     | 10556.92188    | 10556.88851      |
| 6    | 1     | 5     | 5    | 6     | 0      | 6      | 5     | 10696.98438    | 10696.98168      |
| 6    | 1     | 5     | 7    | 6     | 0      | 6      | 7     | 10697.14062    | 10697.1569       |
| 6    | 1     | 5     | 6    | 6     | 0      | 6      | 6     | 10698.1875     | 10698.19737      |
| 3    | 1     | 2     | 2    | 2     | 1      | 1      | 2     | 11115.14062    | 11115.15336      |
| 3    | 1     | 2     | 4    | 2     | 1      | 1      | 3     | 11116.1875     | 11116.16284      |
| 3    | 1     | 2     | 3    | 2     | 1      | 1      | 3     | 11116.9375     | 11116.93749      |
| 7    | 1     | 6     | 6    | 7     | 0      | 7      | 6     | 12397.42188    | 12397.3995       |
| 7    | 1     | 6     | 8    | 7     | 0      | 7      | 8     | 12397.5625     | 12397.56058      |
| 7    | 1     | 6     | 7    | 7     | 0      | 7      | 7     | 12398.67188    | 12398.67941      |
| 5    | 0     | 5     | 4    | 4     | 1      | 4      | 3     | 12563.76562    | 12563.80637      |
| 5    | 0     | 5     | 6    | 4     | 1      | 4      | 5     | 12563.9375     | 12563.94755      |
| 5    | 0     | 5     | 5    | 4     | 1      | 4      | 4     | 12564.4375     | 12564.45977      |
| 2    | 1     | 2     | 2    | 1     | 0      | 1      | 1     | 12955.57812    | 12955.59097      |
| 2    | 1     | 2     | 3    | 1     | 0      | 1      | 2     | 12956.32812    | 12956.32469      |
| 2    | 1     | 2     | 1    | 1     | 0      | 1      | 0     | 12956.8125     | 12956.80477      |
| 4    | 1     | 4     | 4    | 3     | 1      | 3      | 4     | 13437.32812    | 13437.34127      |
| 4    | 1     | 4     | 5    | 3     | 1      | 3      | 4     | 13438.04688    | 13438.03963      |
| 4    | 0     | 4     | 5    | 3     | 0      | 3      | 4     | 14012.85938    | 14012.8557       |
| 4    | 2     | 3     | 5    | 3     | 2      | 2      | 4     | 14138.32812    | 14138.28485      |
| 4    | 2     | 2     | 5    | 3     | 2      | 1      | 4     | 14274.14062    | 14274.18248      |
| 8    | 1     | 7     | 8    | 8     | 0      | 8      | 8     | 14452.51562    | 14452.53513      |

|   |   |   |    |   |   |   |    |             |             |
|---|---|---|----|---|---|---|----|-------------|-------------|
| 4 | 1 | 3 | 3  | 3 | 1 | 2 | 3  | 14803.65625 | 14803.66981 |
| 4 | 1 | 3 | 5  | 3 | 1 | 2 | 4  | 14804.625   | 14804.64533 |
| 4 | 1 | 3 | 4  | 3 | 1 | 2 | 4  | 14805.42188 | 14805.42585 |
| 3 | 1 | 3 | 3  | 2 | 0 | 2 | 2  | 15984.89062 | 15984.87807 |
| 3 | 1 | 3 | 4  | 2 | 0 | 2 | 3  | 15985.60938 | 15985.59778 |
| 3 | 1 | 3 | 2  | 2 | 0 | 2 | 1  | 15985.875   | 15985.84377 |
| 6 | 0 | 6 | 5  | 5 | 1 | 5 | 4  | 16555.125   | 16555.07582 |
| 6 | 0 | 6 | 7  | 5 | 1 | 5 | 6  | 16555.17188 | 16555.17361 |
| 6 | 0 | 6 | 6  | 5 | 1 | 5 | 5  | 16555.60938 | 16555.60591 |
| 5 | 1 | 5 | 5  | 4 | 1 | 4 | 5  | 16773.25    | 16773.26171 |
| 5 | 1 | 5 | 6  | 4 | 1 | 4 | 5  | 16773.96875 | 16773.98868 |
| 5 | 1 | 5 | 4  | 4 | 1 | 4 | 4  | 16774.82812 | 16774.83507 |
| 5 | 0 | 5 | 6  | 4 | 0 | 4 | 5  | 17417.82812 | 17417.84075 |
| 5 | 2 | 4 | 6  | 4 | 2 | 3 | 5  | 17655.60938 | 17655.60292 |
| 6 | 2 | 4 | 6  | 6 | 1 | 5 | 6  | 16639.89062 | 16639.87288 |
| 6 | 2 | 4 | 7  | 6 | 1 | 5 | 7  | 16640.1875  | 16640.21723 |
| 5 | 2 | 3 | 5  | 5 | 1 | 4 | 5  | 17150.6875  | 17150.63439 |
| 5 | 2 | 3 | 6  | 5 | 1 | 4 | 6  | 17151.125   | 17151.10498 |
| 7 | 2 | 5 | 7  | 7 | 1 | 6 | 7  | 16242.90625 | 16242.92825 |
| 7 | 2 | 5 | 8  | 7 | 1 | 6 | 8  | 16243.125   | 16243.13829 |
| 4 | 2 | 2 | 4  | 4 | 1 | 3 | 4  | 17704.53125 | 17704.54747 |
| 4 | 2 | 2 | 5  | 4 | 1 | 3 | 5  | 17705.125   | 17705.12794 |
| 4 | 2 | 2 | 3  | 4 | 1 | 3 | 3  | 17705.26562 | 17705.27867 |
| 3 | 3 | 1 | 3  | 4 | 2 | 2 | 4  | 17638.78125 | 17638.7748  |
| 3 | 3 | 1 | 4  | 4 | 2 | 2 | 5  | 17639.07812 | 17639.06678 |
| 3 | 2 | 2 | 4  | 2 | 2 | 1 | 3  | 10611.8125  | 10611.76489 |
| 3 | 2 | 1 | 4  | 2 | 2 | 0 | 3  | 10666.51562 | 10666.50276 |
| 3 | 2 | 1 | 3  | 2 | 2 | 0 | 2  | 10666.64062 | 10666.64256 |
| 8 | 2 | 6 | 9  | 8 | 1 | 7 | 9  | 16028.25    | 16028.22027 |
| 9 | 2 | 7 | 10 | 9 | 1 | 8 | 10 | 16056.625   | 16056.6611  |
| 9 | 2 | 7 | 9  | 9 | 1 | 8 | 9  | 16056.78125 | 16056.72799 |
| 9 | 1 | 8 | 10 | 9 | 0 | 9 | 10 | 16856       | 16856.00781 |
| 9 | 1 | 8 | 9  | 9 | 0 | 9 | 9  | 16857.26562 | 16857.21759 |
| 5 | 3 | 3 | 6  | 4 | 3 | 2 | 5  | 17730.01562 | 17730.04856 |
| 5 | 3 | 2 | 6  | 4 | 3 | 1 | 5  | 17737.21875 | 17737.2546  |
| 5 | 3 | 2 | 5  | 4 | 3 | 1 | 4  | 17737.375   | 17737.31347 |
| 3 | 3 | 0 | 4  | 4 | 2 | 3 | 5  | 17843.70312 | 17843.76525 |
| 4 | 3 | 2 | 5  | 3 | 3 | 1 | 4  | 14175.65625 | 14175.64385 |
| 4 | 3 | 1 | 5  | 3 | 3 | 0 | 4  | 14177.71875 | 14177.70579 |
| 4 | 3 | 1 | 5  | 5 | 2 | 4 | 6  | 14365.89062 | 14365.86812 |
| 8 | 1 | 7 | 9  | 7 | 2 | 6 | 8  | 14737.25    | 14737.25512 |

|   |   |   |   |   |   |   |   |             |             |
|---|---|---|---|---|---|---|---|-------------|-------------|
| 8 | 1 | 7 | 8 | 7 | 2 | 6 | 7 | 14737.89062 | 14737.91451 |
| 3 | 3 | 1 | 3 | 4 | 2 | 2 | 4 | 17638.78125 | 17638.7748  |
| 3 | 3 | 1 | 4 | 4 | 2 | 2 | 5 | 17639.07812 | 17639.06678 |
| 5 | 4 | 1 | 6 | 4 | 4 | 0 | 5 | 17717.375   | 17717.37928 |

**Table S2:** Linelist of *eclipsed* 3-pentenitrile A-states from SPFIT.<sup>1</sup>

| J up | Ka up | Kc up | F up | J low | Ka low | Kc low | F low | Observed (MHz) | Calculated (MHz) |
|------|-------|-------|------|-------|--------|--------|-------|----------------|------------------|
| 3    | 1     | 3     | 4    | 2     | 1      | 2      | 3     | 8513.25        | 8513.32845       |
| 3    | 1     | 3     | 3    | 2     | 1      | 2      | 2     | 8513.4375      | 8513.4095        |
| 3    | 0     | 3     | 4    | 2     | 0      | 2      | 3     | 8631.6875      | 8631.67795       |
| 3    | 1     | 2     | 4    | 2     | 1      | 1      | 3     | 8753.125       | 8753.15824       |
| 4    | 1     | 4     | 5    | 3     | 1      | 3      | 4     | 11350.5625     | 11350.57581      |
| 4    | 1     | 4     | 4    | 3     | 1      | 3      | 3     | 11350.6875     | 11350.61586      |
| 4    | 0     | 4     | 5    | 3     | 0      | 3      | 4     | 11506.875      | 11506.88577      |
| 4    | 0     | 4     | 3    | 3     | 0      | 3      | 2     | 11506.9375     | 11506.90593      |
| 2    | 1     | 1     | 3    | 2     | 0      | 2      | 3     | 11553.125      | 11553.12047      |
| 4    | 1     | 3     | 5    | 3     | 1      | 2      | 4     | 11670.3125     | 11670.32123      |
| 4    | 1     | 3     | 4    | 3     | 1      | 2      | 3     | 11670.375      | 11670.34193      |
| 5    | 1     | 5     | 6    | 4     | 1      | 4      | 5     | 14187.375      | 14187.34475      |
| 1    | 1     | 1     | 1    | 0     | 0      | 0      | 1     | 14270.6875     | 14270.64562      |
| 5    | 0     | 5     | 6    | 4     | 0      | 4      | 5     | 14380.375      | 14380.3591       |
| 5    | 1     | 4     | 6    | 4     | 1      | 3      | 5     | 14586.9375     | 14586.99718      |
| 5    | 1     | 4     | 5    | 4     | 1      | 3      | 4     | 14587          | 14587.00824      |
| 6    | 1     | 6     | 7    | 5     | 1      | 5      | 6     | 17023.5        | 17023.52687      |
| 2    | 1     | 2     | 3    | 1     | 0      | 1      | 2     | 17068.25       | 17068.30248      |
| 2    | 1     | 2     | 2    | 1     | 0      | 1      | 1     | 17068.625      | 17068.61222      |
| 6    | 0     | 6     | 7    | 5     | 0      | 5      | 6     | 17251.6875     | 17251.66943      |
| 6    | 1     | 5     | 7    | 5     | 1      | 4      | 6     | 17503.0625     | 17503.06122      |
| 1    | 1     | 0     | 1    | 1     | 0      | 1      | 1     | 11471.9375     | 11471.95046      |
| 1    | 1     | 0     | 2    | 1     | 0      | 1      | 2     | 11472.625      | 11472.66113      |
| 1    | 1     | 0     | 0    | 1     | 0      | 1      | 1     | 11473.1875     | 11473.18202      |
| 4    | 1     | 3     | 4    | 4     | 0      | 4      | 4     | 11837.625      | 11837.55188      |
| 4    | 1     | 3     | 5    | 4     | 0      | 4      | 5     | 11838          | 11838.03622      |

**Table S3:** Spectral fits of the hypothetical central frequencies using the XIAM program suite<sup>2</sup> are shown along with the values resulting from DFT calculations (Representation I<sup>r</sup> Watson S reduction).

| <b>3-Pentenenitrile</b>                            | <i>Syn</i>                | <i>Eclipsed</i>           |
|----------------------------------------------------|---------------------------|---------------------------|
| <b>A (MHz) (pred<sup>a</sup>/expt<sup>b</sup>)</b> | 8312.7855 / 8163.609(18)  | 12901.0547 / 12.878(17)   |
| <b>B (MHz) (pred/expt)</b>                         | 1926.6016 / 1939.7349(30) | 1484.7483 / 1478.8851(63) |
| <b>C (MHz) (pred/expt)</b>                         | 1594.5939 / 1597.5068(32) | 1406.0122 / 1398.9110(83) |
| <b>F<sub>0</sub> (fixed)</b>                       | 158.0                     | 158.0                     |
| <b>D<sub>J</sub> (kHz) (expt)</b>                  | 0.757(38)                 | 0.502(37)                 |
| <b>D<sub>JK</sub> (kHz) (expt)</b>                 | 5.25(18)                  | -27.39(51)                |
| <b>D<sub>K</sub> (kHz) (expt)</b>                  | 30.1(18)                  | -                         |
| <b>d<sub>1</sub> (kHz) (expt)</b>                  | 0.219(10)                 | -0.105(58)                |
| <b>Dpi2J (expt)</b>                                | 0.00141(57)               | -                         |
| <b>Dpi2K (expt)</b>                                | -0.0185(29)               | -                         |
| <b>Dpi2- (expt)</b>                                | 0.00144(33)               | -                         |
| <b>δ (fixed)</b>                                   | 2.099929695               | 0.544274057               |
| <b>ε (fixed)</b>                                   | 2.612459285               | 1.090581459               |
| <b>rms (kHz)</b>                                   | 64                        | 22                        |
| <b>N<sup>c</sup></b>                               | 60                        | 18                        |
| <b>V<sub>3</sub> (cm<sup>-1</sup>) (pred/expt)</b> | 609.3 / 553.8±2.4         | 588.6 / 619.9±0.9         |

<sup>a</sup> pred: predicted values at B3LYP-GD3BJ/Def2TZVP

<sup>b</sup> expt: experimental fit values

<sup>c</sup> N is the number of hypothetical central transitions (not counting individual hyperfine transitions) fit.

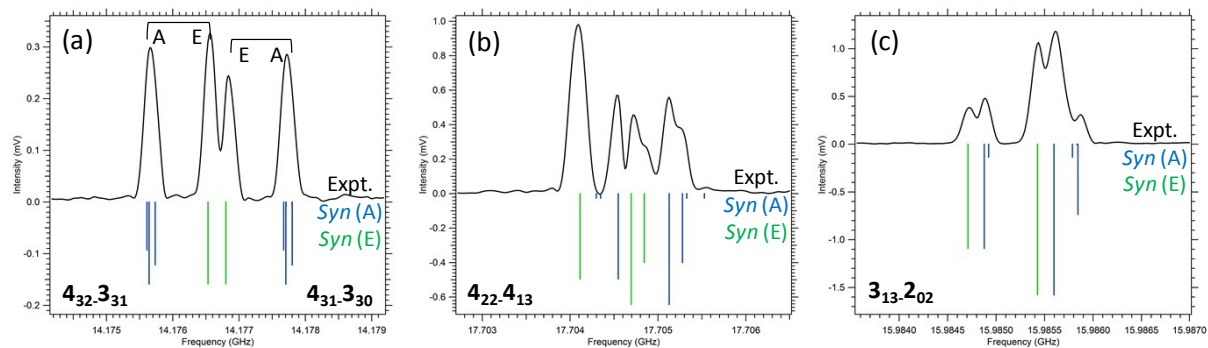

**Figure S2:** A closer look at additional *syn* 3-pentenenitrile transitions. The black trace in each case is the experimental spectrum while the final fits of the A states (blue trace) and E states (green trace) are shown as sticks below. (a) The  $4_{32}-3_{31}$  and  $4_{31}-3_{30}$  transitions exhibit only methyl rotor splittings whereas (b)  $4_{22}-4_{13}$  and (c)  $3_{13}-2_{02}$  show both hyperfine and methyl rotor splittings.

**Table S4:** Linelist of *syn* 3-pentenenitrile from XIAM.<sup>2</sup>

| J<br>up | Ka<br>up | Kc<br>up | F<br>up | J<br>low | Ka<br>low | Kc<br>low | F<br>low | A state (MHz)  |                | E state (MHz)  |                |
|---------|----------|----------|---------|----------|-----------|-----------|----------|----------------|----------------|----------------|----------------|
|         |          |          |         |          |           |           |          | Calculated     | Observed       | Calculated     | Observed       |
| 4       | 1        | 3        | 3       | 4        | 0         | 4         | 3        | 8272.7194      | 8272.7656      | 8272.5723      | 8272.5625      |
| 4       | 1        | 3        | 5       | 4        | 0         | 4         | 5        | 8272.9432      | 8272.9375      | 8272.7961      | 8272.7344      |
| 4       | 1        | 3        | 4       | 4        | 0         | 4         | 4        | 8273.8137      | 8273.8125      | 8273.6666      | 8273.6094      |
| 4       | 0        | 4        | 3       | 3        | 1         | 3         | 2        | 8583.9385      | 8583.9219      | 8584.0936      | 8584.1094      |
| 4       | 0        | 4        | 5       | 3        | 1         | 3         | 4        | 8584.1509      | 8584.1407      | 8584.306       | 8584.3282      |
| 4       | 0        | 4        | 4       | 3        | 1         | 3         | 3        | 8584.7347      | 8584.7188      | 8584.8898      | 8584.9063      |
| 5       | 1        | 4        | 4       | 5        | 0         | 5         | 4        | 9332.4687      | 9332.4844      | 9332.3321      | 9332.2969      |
| 5       | 1        | 4        | 6       | 5        | 0         | 5         | 6        | 9332.6633      | 9332.6563      | 9332.5267      | 9332.4688      |
| 5       | 1        | 4        | 5       | 5        | 0         | 5         | 5        | 9333.6184      | 9333.625       | 9333.4818      | 9333.4375      |
| 1       | 1        | 1        | 1       | 0        | 0         | 0         | 1        | 9760.546       | 9760.5312      | 9760.3721      | 9760.3594      |
| 1       | 1        | 1        | 2       | 0        | 0         | 0         | 1        | 9761.2372      | 9761.2343      | 9761.0633      | 9761.0625      |
| 1       | 1        | 1        | 0       | 0        | 0         | 0         | 1        | 9762.2741      | 9762.2656      | 9762.1001      | 9762.0938      |
| 7       | 1        | 6        | 7       | 6        | 2         | 5         | 6        | 10045.139      | 10045.215<br>8 |                |                |
| 3       | 1        | 3        | 3       | 2        | 1         | 2         | 3        | 10089.329<br>7 | 10089.328<br>1 |                |                |
| 3       | 1        | 3        | 4       | 2        | 1         | 2         | 3        | 10090          | 10089.984<br>4 |                |                |
| 3       | 1        | 3        | 2       | 2        | 1         | 2         | 2        | 10090.890<br>8 | 10090.890<br>6 |                |                |
| 3       | 0        | 3        | 4       | 2        | 0         | 2         | 3        | 10556.892<br>3 | 10556.921<br>9 |                |                |
| 3       | 2        | 2        | 4       | 2        | 2         | 1         | 3        | 10611.765<br>3 | 10611.812<br>5 | 10612.400<br>4 | 10612.437<br>5 |
| 3       | 2        | 1        | 4       | 2        | 2         | 0         | 3        | 10666.503<br>5 | 10666.515<br>6 | 10665.861<br>3 | 10665.882<br>8 |
| 3       | 2        | 1        | 3       | 2        | 2         | 0         | 2        | 10666.647<br>1 | 10666.640<br>6 | 10666.006<br>7 | 10666.007<br>8 |
| 6       | 1        | 5        | 5       | 6        | 0         | 6         | 5        | 10696.978      | 10696.984<br>4 | 10696.856<br>3 | 10696.812<br>5 |
| 6       | 1        | 5        | 7       | 6        | 0         | 6         | 7        | 10697.153<br>5 | 10697.140<br>6 | 10697.031<br>8 | 10696.968<br>7 |
| 6       | 1        | 5        | 6       | 6        | 0         | 6         | 6        | 10698.192<br>9 | 10698.187<br>5 | 10698.071<br>2 | 10698.015<br>6 |
| 3       | 1        | 2        | 2       | 2        | 1         | 1         | 2        | 11115.152<br>6 | 11115.140<br>6 |                |                |
| 3       | 1        | 2        | 4       | 2        | 1         | 1         | 3        | 11116.165<br>3 | 11116.187<br>5 |                |                |
| 3       | 1        | 2        | 3       | 2        | 1         | 1         | 3        | 11116.942<br>7 | 11116.937<br>5 |                |                |
| 7       | 1        | 6        | 6       | 7        | 0         | 7         | 6        | 12397.398      | 12397.421      | 12397.295      | 12397.312      |



|   |   |   |   |   |   |   |   |                |                |                |                |
|---|---|---|---|---|---|---|---|----------------|----------------|----------------|----------------|
|   |   |   |   |   |   |   |   | 3              | 9              | 4              | 5              |
| 7 | 1 | 6 | 8 | 7 | 0 | 7 | 8 | 12397.559<br>5 | 12397.562<br>5 | 12397.456<br>6 | 12397.453<br>1 |
| 7 | 1 | 6 | 7 | 7 | 0 | 7 | 7 | 12398.677<br>4 | 12398.671<br>9 | 12398.574<br>5 | 12398.562<br>5 |
| 5 | 0 | 5 | 4 | 4 | 1 | 4 | 3 | 12563.81       | 12563.765<br>6 | 12563.957<br>5 | 12563.937<br>5 |
| 5 | 0 | 5 | 6 | 4 | 1 | 4 | 5 | 12563.951<br>5 | 12563.937<br>5 | 12564.099      | 12564.109<br>4 |
| 2 | 1 | 2 | 2 | 1 | 0 | 1 | 1 | 12955.592<br>3 | 12955.578<br>1 | 12955.421<br>1 | 12955.390<br>6 |
| 2 | 1 | 2 | 3 | 1 | 0 | 1 | 2 | 12956.327<br>3 | 12956.328<br>1 | 12956.156<br>1 | 12956.140<br>6 |
| 2 | 1 | 2 | 1 | 1 | 0 | 1 | 0 | 12956.81       | 12956.812<br>5 | 12956.638<br>8 | 12956.625      |
| 4 | 1 | 4 | 4 | 3 | 1 | 3 | 4 | 13437.348<br>4 | 13437.328<br>1 |                |                |
| 4 | 1 | 4 | 5 | 3 | 1 | 3 | 4 | 13438.042<br>7 | 13438.046<br>9 |                |                |
| 4 | 0 | 4 | 5 | 3 | 0 | 3 | 4 | 14012.859<br>5 | 14012.859<br>4 |                |                |
| 4 | 2 | 3 | 5 | 3 | 2 | 2 | 4 | 14138.284<br>8 | 14138.328<br>1 |                |                |
| 4 | 3 | 2 | 5 | 3 | 3 | 1 | 4 | 14175.639<br>6 | 14175.656<br>2 | 14176.531<br>6 | 14176.562<br>5 |
| 4 | 3 | 1 | 5 | 3 | 3 | 0 | 4 | 14177.703<br>1 | 14177.718<br>8 | 14176.801<br>8 | 14176.843<br>7 |
| 4 | 2 | 2 | 5 | 3 | 2 | 1 | 4 | 14274.185<br>1 | 14274.140<br>6 |                |                |
| 4 | 2 | 2 | 4 | 3 | 2 | 1 | 3 | 14274.291<br>1 | 14274.171<br>9 |                |                |
| 4 | 3 | 1 | 5 | 5 | 2 | 4 | 6 | 14365.866<br>7 | 14365.890<br>6 |                |                |
| 8 | 1 | 7 | 8 | 8 | 0 | 8 | 8 | 14452.538<br>2 | 14452.515<br>6 | 14452.456<br>6 | 14452.484<br>4 |
| 8 | 1 | 7 | 9 | 7 | 2 | 6 | 8 | 14737.270<br>3 | 14737.25       |                |                |
| 8 | 1 | 7 | 8 | 7 | 2 | 6 | 7 | 14737.929<br>4 | 14737.890<br>6 |                |                |
| 4 | 1 | 3 | 3 | 3 | 1 | 2 | 3 | 14803.669<br>1 | 14803.656<br>2 |                |                |
| 4 | 1 | 3 | 5 | 3 | 1 | 2 | 4 | 14804.648<br>1 | 14804.625      |                |                |
| 4 | 1 | 3 | 4 | 3 | 1 | 2 | 4 | 14805.432      | 14805.421<br>8 |                |                |
| 3 | 1 | 3 | 3 | 2 | 0 | 2 | 2 | 15984.883<br>6 | 15984.890<br>6 | 15984.710<br>2 | 15984.718<br>8 |
| 3 | 1 | 3 | 4 | 2 | 0 | 2 | 3 | 15985.600<br>9 | 15985.609<br>4 | 15985.427<br>5 | 15985.437<br>6 |

|    |   |   |    |    |   |    |    |                |                |                |                |
|----|---|---|----|----|---|----|----|----------------|----------------|----------------|----------------|
| 3  | 1 | 3 | 2  | 2  | 0 | 2  | 1  | 15985.861<br>7 | 15985.875      |                |                |
| 9  | 2 | 7 | 10 | 9  | 1 | 8  | 10 | 16056.666<br>1 | 16056.625      | 16056.287      | 16056.265<br>6 |
| 9  | 2 | 7 | 9  | 9  | 1 | 8  | 9  | 16056.732<br>3 | 16056.781<br>2 | 16056.353<br>2 | 16056.421<br>8 |
| 7  | 2 | 5 | 7  | 7  | 1 | 6  | 7  | 16242.921<br>3 | 16242.906<br>3 | 16242.481<br>2 | 16242.492<br>2 |
| 7  | 2 | 5 | 8  | 7  | 1 | 6  | 8  | 16243.131<br>5 | 16243.125      | 16242.691<br>4 | 16242.711      |
| 10 | 2 | 8 | 10 | 10 | 1 | 9  | 10 | 16380.512<br>9 | 16380.515<br>6 |                |                |
| 6  | 0 | 6 | 5  | 5  | 1 | 5  | 4  | 16555.077<br>5 | 16555.125      | 16555.213<br>5 | 16555.187<br>5 |
| 6  | 0 | 6 | 7  | 5  | 1 | 5  | 6  | 16555.175<br>7 | 16555.171<br>9 | 16555.311<br>7 | 16555.234<br>4 |
| 6  | 0 | 6 | 6  | 5  | 1 | 5  | 5  | 16555.607<br>8 | 16555.609<br>4 | 16555.743<br>8 | 16555.671<br>9 |
| 6  | 2 | 4 | 6  | 6  | 1 | 5  | 6  | 16639.864<br>9 | 16639.890<br>6 |                |                |
| 6  | 2 | 4 | 7  | 6  | 1 | 5  | 7  | 16640.209<br>8 | 16640.187<br>5 |                |                |
| 5  | 1 | 5 | 5  | 4  | 1 | 4  | 5  | 16773.267<br>4 | 16773.25       |                |                |
| 5  | 1 | 5 | 6  | 4  | 1 | 4  | 5  | 16773.99       | 16773.968<br>8 |                |                |
| 5  | 1 | 5 | 4  | 4  | 1 | 4  | 4  | 16774.831<br>5 | 16774.828<br>1 |                |                |
| 9  | 1 | 8 | 10 | 9  | 0 | 9  | 10 | 16856.017<br>9 | 16856          |                |                |
| 9  | 1 | 8 | 9  | 9  | 0 | 9  | 9  | 16857.247      | 16857.265<br>6 |                |                |
| 11 | 2 | 9 | 11 | 11 | 1 | 10 | 11 | 17042.683<br>5 | 17042.687<br>5 | 17042.398<br>9 | 17042.406<br>2 |
| 5  | 2 | 3 | 5  | 5  | 1 | 4  | 5  | 17150.629<br>4 | 17150.687<br>5 |                |                |
| 5  | 2 | 3 | 6  | 5  | 1 | 4  | 6  | 17151.099<br>3 | 17151.125      |                |                |
| 5  | 0 | 5 | 6  | 4  | 0 | 4  | 5  | 17417.843<br>3 | 17417.828<br>1 |                |                |
| 3  | 3 | 1 | 3  | 4  | 2 | 2  | 4  | 17638.763      | 17638.781<br>3 |                |                |
| 3  | 3 | 1 | 3  | 4  | 2 | 2  | 4  | 17638.763      | 17638.781<br>3 |                |                |
| 3  | 3 | 1 | 4  | 4  | 2 | 2  | 5  | 17639.063<br>3 | 17639.078<br>2 |                |                |
| 3  | 3 | 1 | 4  | 4  | 2 | 2  | 5  | 17639.063<br>3 | 17639.078<br>2 |                |                |
| 5  | 2 | 4 | 6  | 4  | 2 | 3  | 5  | 17655.599<br>9 | 17655.609<br>4 |                |                |

|   |   |   |   |   |   |   |   |                |                |                |                |
|---|---|---|---|---|---|---|---|----------------|----------------|----------------|----------------|
| 4 | 2 | 2 | 4 | 4 | 1 | 3 | 4 | 17704.543<br>9 | 17704.531<br>2 | 17704.113<br>7 | 17704.117<br>2 |
| 4 | 2 | 2 | 5 | 4 | 1 | 3 | 5 | 17705.125<br>2 | 17705.125      | 17704.695      | 17704.710<br>9 |
| 4 | 2 | 2 | 3 | 4 | 1 | 3 | 3 | 17705.274<br>7 | 17705.265<br>6 | 17704.844<br>6 | 17704.851<br>6 |
| 5 | 4 | 1 | 6 | 4 | 4 | 0 | 5 | 17717.366<br>6 | 17717.375      |                |                |
| 5 | 3 | 3 | 6 | 4 | 3 | 2 | 5 | 17730.042<br>3 | 17730.015<br>6 | 17731.873<br>4 | 17731.843<br>7 |
| 5 | 3 | 2 | 6 | 4 | 3 | 1 | 5 | 17737.248<br>6 | 17737.218<br>8 | 17735.406<br>4 | 17735.390<br>6 |
| 5 | 3 | 2 | 5 | 4 | 3 | 1 | 4 | 17737.309<br>4 | 17737.375      | 17735.467<br>1 | 17735.546<br>8 |
| 3 | 3 | 0 | 4 | 4 | 2 | 3 | 5 | 17843.763<br>5 | 17843.703<br>1 |                |                |
| 5 | 2 | 3 | 6 | 4 | 2 | 2 | 5 | 17923.537<br>3 | 17923.5        |                |                |
| 5 | 2 | 3 | 5 | 4 | 2 | 2 | 4 | 17923.637<br>9 | 17923.546<br>9 |                |                |

**Table S5:** Linelist of *eclipsed* 3-pentenitrile from XIAM.<sup>2</sup>

| J up | Ka up | Kc up | F up | J low | Ka low | Kc low | F low | State | Calculated (MHz) | Observed (MHz) |
|------|-------|-------|------|-------|--------|--------|-------|-------|------------------|----------------|
| 3    | 1     | 3     | 4    | 2     | 1      | 2      | 3     | A     | 8513.2989        | 8513.25        |
| 3    | 0     | 3     | 4    | 2     | 0      | 2      | 3     | A     | 8631.6466        | 8631.6875      |
| 3    | 1     | 2     | 4    | 2     | 1      | 1      | 3     | A     | 8753.1405        | 8753.125       |
| 4    | 1     | 4     | 5    | 3     | 1      | 3      | 4     | A     | 11350.547        | 11350.5625     |
| 4    | 1     | 4     | 4    | 3     | 1      | 3      | 3     | A     | 11350.5849       | 11350.6875     |
| 4    | 0     | 4     | 5    | 3     | 0      | 3      | 4     | A     | 11506.8547       | 11506.875      |
| 4    | 0     | 4     | 3    | 3     | 0      | 3      | 2     | A     | 11506.8727       | 11506.9375     |
| 2    | 1     | 1     | 3    | 2     | 0      | 2      | 3     | A     | 11553.1391       | 11553.125      |
| 4    | 1     | 3     | 5    | 3     | 1      | 2      | 4     | A     | 11670.3069       | 11670.3125     |
| 4    | 1     | 3     | 4    | 3     | 1      | 2      | 3     | A     | 11670.3243       | 11670.375      |
| 5    | 1     | 5     | 6    | 4     | 1      | 4      | 5     | A     | 14187.3267       | 14187.375      |
| 1    | 1     | 1     | 1    | 0     | 0      | 0      | 1     | A     | 14270.6641       | 14270.6875     |
| 5    | 0     | 5     | 6    | 4     | 0      | 4      | 5     | A     | 14380.3381       | 14380.375      |
| 5    | 1     | 4     | 6    | 4     | 1      | 3      | 5     | A     | 14586.9966       | 14586.9375     |
| 5    | 1     | 4     | 5    | 4     | 1      | 3      | 4     | A     | 14587.0058       | 14587          |
| 6    | 1     | 6     | 7    | 5     | 1      | 5      | 6     | A     | 17023.532        | 17023.5        |
| 2    | 1     | 2     | 3    | 1     | 0      | 1      | 2     | A     | 17068.2765       | 17068.25       |
| 2    | 1     | 2     | 2    | 1     | 0      | 1      | 1     | A     | 17068.6202       | 17068.625      |
| 6    | 0     | 6     | 7    | 5     | 0      | 5      | 6     | A     | 17251.6706       | 17251.6875     |
| 6    | 1     | 5     | 7    | 5     | 1      | 4      | 6     | A     | 17503.0869       | 17503.0625     |
| 1    | 1     | 0     | 1    | 1     | 0      | 1      | 1     | A     | 11471.9668       | 11471.9375     |
| 1    | 1     | 0     | 2    | 1     | 0      | 1      | 2     | A     | 11472.6677       | 11472.625      |
| 1    | 1     | 0     | 0    | 1     | 0      | 1      | 1     | A     | 11473.2275       | 11473.1875     |
| 4    | 1     | 3     | 4    | 4     | 0      | 4      | 4     | A     | 11837.5784       | 11837.625      |
| 6    | 2     | 5     | 7    | 5     | 2      | 4      | 6     | A     | 17265.7751       | 17265.7812     |
| 6    | 2     | 5     | 7    | 5     | 2      | 4      | 6     | E     | 17266.7624       | 17266.7813     |
| 6    | 2     | 4     | 7    | 5     | 2      | 3      | 6     | A     | 17280.435        | 17280.4375     |
| 6    | 2     | 4     | 7    | 5     | 2      | 3      | 6     | E     | 17279.4283       | 17279.4375     |

|   |   |   |   |   |   |   |   |   |            |            |
|---|---|---|---|---|---|---|---|---|------------|------------|
| 5 | 2 | 4 | 6 | 4 | 2 | 3 | 5 | A | 14388.8923 | 14388.9062 |
| 5 | 2 | 4 | 6 | 4 | 2 | 3 | 5 | E | 14390.4082 | 14390.3906 |
| 5 | 2 | 3 | 6 | 4 | 2 | 2 | 5 | A | 14397.2743 | 14397.25   |
| 5 | 2 | 3 | 6 | 4 | 2 | 2 | 5 | E | 14395.7421 | 14395.7344 |

**Table S6:** Linelist of *eg*+ 4-pentenenitrile from SPFIT.<sup>1</sup>

| J up | Ka up | Kc up | F up | J low | Ka low | Kc low | F low | Observed (MHz) | Calculated (MHz) |
|------|-------|-------|------|-------|--------|--------|-------|----------------|------------------|
| 2    | 1     | 1     | 1    | 1     | 1      | 0      | 1     | 7585.375       | 7585.36953       |
| 2    | 1     | 1     | 2    | 1     | 1      | 0      | 1     | 7585.984       | 7585.98653       |
| 2    | 1     | 1     | 3    | 1     | 1      | 0      | 2     | 7586.156       | 7586.16076       |
| 2    | 1     | 1     | 2    | 1     | 1      | 0      | 2     | 7586.547       | 7586.55744       |
| 2    | 1     | 1     | 1    | 1     | 1      | 0      | 0     | 7586.781       | 7586.7968        |
| 4    | 1     | 3     | 3    | 4     | 0      | 4      | 3     | 7768.891       | 7768.89758       |
| 4    | 1     | 3     | 5    | 4     | 0      | 4      | 5     | 7769.078       | 7769.06568       |
| 4    | 1     | 3     | 4    | 4     | 0      | 4      | 4     | 7769.719       | 7769.71316       |
| 5    | 1     | 4     | 6    | 5     | 0      | 5      | 6     | 8535.344       | 8535.34971       |
| 5    | 1     | 4     | 5    | 5     | 0      | 5      | 5     | 8536.031       | 8536.03363       |
| 2    | 2     | 0     | 1    | 3     | 1      | 3      | 2     | 8932.109       | 8932.10427       |
| 2    | 2     | 0     | 3    | 3     | 1      | 3      | 4     | 8932.469       | 8932.47713       |
| 2    | 2     | 0     | 2    | 3     | 1      | 3      | 3     | 8933.406       | 8933.41064       |
| 4    | 0     | 4     | 4    | 3     | 1      | 3      | 4     | 8938.75        | 8938.76864       |
| 4    | 0     | 4     | 3    | 3     | 1      | 3      | 2     | 8938.938       | 8938.93404       |
| 4    | 0     | 4     | 5    | 3     | 1      | 3      | 4     | 8939.098       | 8939.09284       |
| 4    | 0     | 4     | 4    | 3     | 1      | 3      | 3     | 8939.469       | 8939.46517       |
| 4    | 0     | 4     | 3    | 3     | 1      | 3      | 3     | 8939.875       | 8939.87437       |
| 6    | 1     | 5     | 7    | 6     | 0      | 6      | 7     | 9512.188       | 9512.21414       |
| 6    | 1     | 5     | 6    | 6     | 0      | 6      | 6     | 9512.953       | 9512.94163       |
| 1    | 1     | 1     | 1    | 0     | 0      | 0      | 1     | 9912.406       | 9912.4098        |
| 1    | 1     | 1     | 2    | 0     | 0      | 0      | 1     | 9912.781       | 9912.78006       |
| 1    | 1     | 1     | 0    | 0     | 0      | 0      | 1     | 9913.328       | 9913.33541       |
| 1    | 1     | 0     | 0    | 0     | 0      | 0      | 1     | 10170.609      | 10170.58848      |
| 1    | 1     | 0     | 2    | 0     | 0      | 0      | 1     | 10171.453      | 10171.44483      |
| 1    | 1     | 0     | 1    | 0     | 0      | 0      | 1     | 10172.016      | 10172.01575      |
| 3    | 1     | 3     | 3    | 2     | 1      | 2      | 3     | 10597.203      | 10597.21336      |
| 3    | 1     | 3     | 3    | 2     | 1      | 2      | 2     | 10597.813      | 10597.82506      |

|   |   |   |   |   |   |   |   |           |             |
|---|---|---|---|---|---|---|---|-----------|-------------|
| 3 | 1 | 3 | 4 | 2 | 1 | 2 | 3 | 10597.906 | 10597.90988 |
| 3 | 1 | 3 | 2 | 2 | 1 | 2 | 2 | 10598.766 | 10598.76538 |
| 7 | 1 | 6 | 8 | 7 | 0 | 7 | 8 | 10723.484 | 10723.49438 |
| 7 | 1 | 6 | 7 | 7 | 0 | 7 | 7 | 10724.281 | 10724.26828 |
| 3 | 0 | 3 | 3 | 2 | 0 | 2 | 3 | 10959.094 | 10959.08609 |
| 3 | 0 | 3 | 4 | 2 | 0 | 2 | 3 | 10959.344 | 10959.3616  |
| 3 | 0 | 3 | 2 | 2 | 0 | 2 | 2 | 10959.688 | 10959.69336 |
| 3 | 2 | 2 | 3 | 2 | 2 | 1 | 2 | 10991.125 | 10991.13626 |
| 3 | 2 | 2 | 4 | 2 | 2 | 1 | 3 | 10991.359 | 10991.35128 |
| 3 | 2 | 1 | 3 | 2 | 2 | 0 | 2 | 11022.594 | 11022.59403 |
| 3 | 2 | 1 | 4 | 2 | 2 | 0 | 3 | 11022.781 | 11022.77848 |
| 3 | 1 | 2 | 2 | 2 | 1 | 1 | 2 | 11373.609 | 11373.59715 |
| 3 | 1 | 2 | 4 | 2 | 1 | 1 | 3 | 11374.125 | 11374.11591 |
| 3 | 1 | 2 | 3 | 2 | 1 | 1 | 3 | 11374.469 | 11374.4648  |
| 5 | 0 | 5 | 6 | 4 | 1 | 4 | 5 | 12979.797 | 12979.7954  |
| 5 | 0 | 5 | 5 | 4 | 1 | 4 | 4 | 12980.172 | 12980.15856 |
| 2 | 1 | 2 | 2 | 1 | 0 | 1 | 2 | 13317.094 | 13317.09048 |
| 2 | 1 | 2 | 2 | 1 | 0 | 1 | 1 | 13317.297 | 13317.29117 |
| 2 | 1 | 2 | 3 | 1 | 0 | 1 | 2 | 13317.703 | 13317.70218 |
| 2 | 1 | 2 | 1 | 1 | 0 | 1 | 1 | 13318.25  | 13318.24271 |
| 2 | 1 | 1 | 3 | 1 | 0 | 1 | 2 | 14093.922 | 14093.92498 |
| 2 | 1 | 1 | 2 | 1 | 0 | 1 | 1 | 14094.516 | 14094.52236 |
| 4 | 1 | 4 | 4 | 3 | 1 | 3 | 4 | 14120.813 | 14120.79864 |
| 4 | 1 | 4 | 5 | 3 | 1 | 3 | 4 | 14121.516 | 14121.54355 |
| 4 | 1 | 4 | 3 | 3 | 1 | 3 | 3 | 14122.438 | 14122.43164 |
| 4 | 0 | 4 | 4 | 3 | 0 | 3 | 4 | 14575.625 | 14575.61805 |
| 4 | 0 | 4 | 5 | 3 | 0 | 3 | 4 | 14575.938 | 14575.94224 |
| 4 | 0 | 4 | 3 | 3 | 0 | 3 | 3 | 14576.297 | 14576.30276 |
| 4 | 1 | 3 | 3 | 3 | 1 | 2 | 3 | 15155.313 | 15155.2977  |
| 4 | 1 | 3 | 5 | 3 | 1 | 2 | 4 | 15155.719 | 15155.7297  |
| 4 | 1 | 3 | 4 | 3 | 1 | 2 | 4 | 15156.063 | 15156.05298 |
| 3 | 1 | 3 | 3 | 2 | 0 | 2 | 3 | 16595.5   | 16595.51448 |
| 3 | 1 | 3 | 3 | 2 | 0 | 2 | 2 | 16595.75  | 16595.74981 |
| 3 | 1 | 3 | 4 | 2 | 0 | 2 | 3 | 16596.219 | 16596.211   |
| 3 | 1 | 3 | 2 | 2 | 0 | 2 | 2 | 16596.688 | 16596.69014 |
| 5 | 1 | 5 | 6 | 4 | 1 | 4 | 5 | 17637.906 | 17637.93217 |
| 7 | 2 | 5 | 8 | 7 | 1 | 6 | 8 | 16591     | 16591.02159 |
| 4 | 2 | 3 | 4 | 3 | 2 | 2 | 3 | 14648.672 | 14648.70397 |
| 4 | 2 | 3 | 5 | 3 | 2 | 2 | 4 | 14648.813 | 14648.80021 |
| 4 | 2 | 2 | 5 | 3 | 2 | 1 | 4 | 14727.094 | 14727.04361 |
| 6 | 2 | 4 | 6 | 6 | 1 | 5 | 6 | 17025.328 | 17025.37952 |

|   |   |   |   |   |   |   |   |           |             |
|---|---|---|---|---|---|---|---|-----------|-------------|
| 6 | 2 | 4 | 7 | 6 | 1 | 5 | 7 | 17025.719 | 17025.63788 |
|---|---|---|---|---|---|---|---|-----------|-------------|

**Table S7:** Linelist of *et* 4-pentenenitrile from SPFIT.<sup>1</sup>

| J up | Ka up | Kc up | F up | J low | Ka low | Kc low | F low | Observed (MHz) | Calculated (MHz) |
|------|-------|-------|------|-------|--------|--------|-------|----------------|------------------|
| 2    | 1     | 2     | 3    | 3     | 0      | 3      | 4     | 7656.359       | 7656.38675       |
| 2    | 1     | 2     | 2    | 3     | 0      | 3      | 3     | 7656.828       | 7656.81065       |
| 3    | 1     | 3     | 3    | 2     | 1      | 2      | 3     | 8443.625       | 8443.6188        |
| 3    | 1     | 3     | 3    | 2     | 1      | 2      | 2     | 8444.281       | 8444.28069       |
| 3    | 1     | 3     | 4    | 2     | 1      | 2      | 3     | 8444.578       | 8444.5766        |
| 3    | 1     | 3     | 2    | 2     | 1      | 2      | 2     | 8445.563       | 8445.57391       |
| 3    | 0     | 3     | 3    | 2     | 0      | 2      | 3     | 8483.703       | 8483.71437       |
| 3    | 0     | 3     | 2    | 2     | 0      | 2      | 1     | 8484.594       | 8484.59862       |
| 3    | 0     | 3     | 4    | 2     | 0      | 2      | 3     | 8484.797       | 8484.80016       |
| 3    | 0     | 3     | 2    | 2     | 0      | 2      | 2     | 8486.219       | 8486.22701       |
| 3    | 1     | 2     | 3    | 2     | 1      | 1      | 3     | 8524.813       | 8524.82988       |
| 3    | 1     | 2     | 3    | 2     | 1      | 1      | 2     | 8525.203       | 8525.21433       |
| 3    | 1     | 2     | 4    | 2     | 1      | 1      | 3     | 8525.5         | 8525.49998       |
| 3    | 1     | 2     | 2    | 2     | 1      | 1      | 2     | 8526.125       | 8526.11921       |
| 1    | 1     | 1     | 0    | 2     | 0      | 2      | 1     | 10510.172      | 10510.17842      |
| 1    | 1     | 1     | 1    | 2     | 0      | 2      | 1     | 10511.063      | 10511.07539      |
| 1    | 1     | 1     | 2    | 2     | 0      | 2      | 3     | 10511.297      | 10511.29841      |
| 1    | 1     | 1     | 1    | 2     | 0      | 2      | 2     | 10512.703      | 10512.70378      |
| 4    | 1     | 4     | 4    | 3     | 1      | 3      | 4     | 11258.234      | 11258.20191      |
| 4    | 1     | 4     | 4    | 3     | 1      | 3      | 3     | 11259.203      | 11259.15971      |
| 4    | 1     | 4     | 5    | 3     | 1      | 3      | 4     | 11259.297      | 11259.29259      |
| 4    | 1     | 4     | 3    | 3     | 1      | 3      | 3     | 11260.531      | 11260.53098      |
| 4    | 0     | 4     | 4    | 3     | 0      | 3      | 4     | 11311.734      | 11311.7431       |
| 4    | 0     | 4     | 5    | 3     | 0      | 3      | 4     | 11312.844      | 11312.85407      |
| 4    | 0     | 4     | 3    | 3     | 0      | 3      | 3     | 11314.234      | 11314.22567      |
| 4    | 1     | 3     | 4    | 3     | 1      | 2      | 4     | 11366.406      | 11366.40791      |
| 4    | 1     | 3     | 5    | 3     | 1      | 2      | 4     | 11367.172      | 11367.20437      |

|   |   |   |   |   |   |   |   |           |             |
|---|---|---|---|---|---|---|---|-----------|-------------|
| 4 | 1 | 3 | 3 | 3 | 1 | 2 | 3 | 11368.094 | 11368.07945 |
| 5 | 1 | 5 | 5 | 4 | 1 | 4 | 5 | 14072.797 | 14072.80579 |
| 5 | 1 | 5 | 6 | 4 | 1 | 4 | 5 | 14073.922 | 14073.96975 |
| 5 | 1 | 5 | 4 | 4 | 1 | 4 | 4 | 14075.328 | 14075.29764 |
| 5 | 0 | 5 | 5 | 4 | 0 | 4 | 5 | 14139.625 | 14139.6265  |
| 5 | 0 | 5 | 6 | 4 | 0 | 4 | 5 | 14140.766 | 14140.75519 |
| 5 | 1 | 4 | 5 | 4 | 1 | 3 | 5 | 14208     | 14208.00863 |
| 5 | 1 | 4 | 6 | 4 | 1 | 3 | 5 | 14208.875 | 14208.87385 |
| 5 | 1 | 4 | 4 | 4 | 1 | 3 | 4 | 14209.844 | 14209.84669 |
| 6 | 1 | 6 | 7 | 5 | 1 | 5 | 6 | 16888.578 | 16888.57964 |
| 6 | 0 | 6 | 7 | 5 | 0 | 5 | 6 | 16968.438 | 16968.46017 |
| 6 | 1 | 5 | 6 | 5 | 1 | 4 | 6 | 17049.625 | 17049.57452 |
| 6 | 1 | 5 | 7 | 5 | 1 | 4 | 6 | 17050.469 | 17050.48211 |
| 1 | 1 | 0 | 1 | 1 | 0 | 1 | 0 | 16194.016 | 16194.02742 |
| 1 | 1 | 0 | 2 | 1 | 0 | 1 | 2 | 16194.875 | 16194.8749  |
| 1 | 1 | 0 | 1 | 1 | 0 | 1 | 2 | 16195.484 | 16195.49261 |
| 1 | 1 | 0 | 2 | 1 | 0 | 1 | 1 | 16195.843 | 16195.85153 |
| 1 | 1 | 0 | 1 | 1 | 0 | 1 | 1 | 16196.453 | 16196.46924 |
| 2 | 1 | 1 | 2 | 2 | 0 | 2 | 1 | 16221.078 | 16221.08833 |
| 2 | 1 | 1 | 1 | 2 | 0 | 2 | 1 | 16221.688 | 16221.68681 |
| 2 | 1 | 1 | 3 | 2 | 0 | 2 | 3 | 16222.063 | 16222.05452 |
| 2 | 1 | 1 | 2 | 2 | 0 | 2 | 2 | 16222.719 | 16222.71672 |
| 2 | 1 | 1 | 3 | 2 | 0 | 2 | 2 | 16223.094 | 16223.10117 |
| 2 | 1 | 1 | 1 | 2 | 0 | 2 | 2 | 16223.328 | 16223.3152  |
| 3 | 1 | 2 | 3 | 3 | 0 | 3 | 2 | 16261.75  | 16261.70404 |
| 3 | 1 | 2 | 3 | 3 | 0 | 3 | 4 | 16262.094 | 16262.08424 |
| 3 | 1 | 2 | 4 | 3 | 0 | 3 | 4 | 16262.75  | 16262.75434 |
| 3 | 1 | 2 | 3 | 3 | 0 | 3 | 3 | 16263.188 | 16263.17003 |
| 3 | 1 | 2 | 4 | 3 | 0 | 3 | 3 | 16263.859 | 16263.84013 |
| 4 | 1 | 3 | 5 | 4 | 0 | 4 | 5 | 16317.141 | 16317.10465 |
| 4 | 1 | 3 | 4 | 4 | 0 | 4 | 4 | 16317.422 | 16317.41916 |
| 5 | 1 | 4 | 6 | 5 | 0 | 5 | 6 | 16385.203 | 16385.22332 |
| 5 | 1 | 4 | 5 | 5 | 0 | 5 | 5 | 16385.437 | 16385.48678 |
| 6 | 1 | 5 | 7 | 6 | 0 | 6 | 7 | 16467.219 | 16467.24526 |
| 6 | 1 | 5 | 6 | 6 | 0 | 6 | 6 | 16467.516 | 16467.47965 |
| 7 | 1 | 6 | 8 | 7 | 0 | 7 | 8 | 16563.313 | 16563.32845 |
| 7 | 1 | 6 | 7 | 7 | 0 | 7 | 7 | 16563.563 | 16563.54496 |
| 8 | 1 | 7 | 9 | 8 | 0 | 8 | 9 | 16673.656 | 16673.65561 |
| 8 | 1 | 7 | 8 | 8 | 0 | 8 | 8 | 16673.859 | 16673.86053 |
| 5 | 2 | 3 | 5 | 4 | 2 | 2 | 4 | 14142.344 | 14142.35614 |
| 5 | 2 | 3 | 6 | 4 | 2 | 2 | 5 | 14142.593 | 14142.58783 |



|   |   |   |   |   |   |   |   |           |            |
|---|---|---|---|---|---|---|---|-----------|------------|
| 6 | 2 | 5 | 7 | 5 | 2 | 4 | 6 | 16970.109 | 16970.1286 |
| 6 | 2 | 4 | 7 | 5 | 2 | 3 | 6 | 16971.313 | 16971.3093 |

**Table S8:** Linelist of *eg*- 4-pentenenitrile from SPFIT.<sup>1</sup>

| J up | Ka up | Kc up | F up | J low | Ka low | Kc low | F low | Observed (MHz) | Calculated (MHz) |
|------|-------|-------|------|-------|--------|--------|-------|----------------|------------------|
| 4    | 0     | 4     | 5    | 3     | 1      | 4      | 4     | 14717.58       | 14717.59         |
| 4    | 0     | 4     | 4    | 3     | 1      | 4      | 3     | 14717.94       | 14717.92         |
| 3    | 1     | 3     | 3    | 2     | 0      | 4      | 2     | 14996.05       | 14996.05         |
| 3    | 1     | 3     | 4    | 2     | 0      | 3      | 3     | 14996.77       | 14996.78         |
| 3    | 1     | 3     | 2    | 2     | 0      | 3      | 1     | 14997.08       | 14997.04         |
| 4    | 1     | 4     | 4    | 3     | 1      | 3      | 4     | 16203.2        | 16203.2          |
| 4    | 1     | 4     | 5    | 3     | 1      | 5      | 4     | 16203.89       | 16203.92         |
| 4    | 1     | 4     | 3    | 3     | 1      | 5      | 3     | 16204.8        | 16204.78         |
| 4    | 0     | 4     | 4    | 3     | 0      | 5      | 3     | 16852.39       | 16852.39         |
| 4    | 0     | 4     | 5    | 3     | 0      | 0      | 4     | 16852.61       | 16852.6          |
| 1    | 1     | 1     | 1    | 0     | 0      | 0      | 1     | 7696           | 7695.994         |
| 1    | 1     | 1     | 2    | 0     | 0      | 0      | 1     | 7696.766       | 7696.774         |
| 1    | 1     | 1     | 0    | 0     | 0      | 2      | 1     | 7697.938       | 7697.945         |
| 2    | 1     | 2     | 1    | 1     | 1      | 2      | 0     | 8167.703       | 8167.679         |
| 2    | 1     | 2     | 3    | 1     | 1      | 2      | 2     | 8168.5         | 8168.484         |
| 2    | 1     | 2     | 1    | 1     | 1      | 2      | 1     | 8169.641       | 8169.63          |
| 2    | 0     | 2     | 3    | 1     | 0      | 6      | 2     | 8693.391       | 8693.42          |
| 2    | 0     | 2     | 1    | 1     | 0      | 6      | 0     | 8693.641       | 8693.639         |
| 2    | 1     | 1     | 1    | 1     | 1      | 6      | 1     | 9365.688       | 9365.682         |
| 2    | 1     | 1     | 3    | 1     | 1      | 1      | 2     | 9366.766       | 9366.76          |
| 2    | 1     | 1     | 2    | 1     | 1      | 1      | 1     | 9366.984       | 9366.982         |
| 2    | 1     | 1     | 1    | 1     | 1      | 1      | 0     | 9367.219       | 9367.217         |
| 2    | 1     | 1     | 2    | 1     | 1      | 7      | 2     | 9367.594       | 9367.596         |
| 5    | 1     | 4     | 4    | 5     | 0      | 7      | 4     | 9776           | 9775.99          |
| 5    | 1     | 4     | 6    | 5     | 0      | 7      | 6     | 9776.25        | 9776.252         |
| 5    | 1     | 4     | 5    | 5     | 0      | 4      | 5     | 9777.531       | 9777.535         |

|   |   |   |   |   |   |   |   |          |          |
|---|---|---|---|---|---|---|---|----------|----------|
| 3 | 0 | 3 | 2 | 2 | 1 | 4 | 1 | 10073.42 | 10073.42 |
| 3 | 0 | 3 | 4 | 2 | 1 | 4 | 3 | 10073.73 | 10073.74 |
| 3 | 0 | 3 | 3 | 2 | 1 | 1 | 2 | 10074.27 | 10074.27 |
| 2 | 1 | 2 | 2 | 1 | 0 | 1 | 1 | 11480.63 | 11480.62 |
| 2 | 1 | 2 | 3 | 1 | 0 | 1 | 2 | 11481.44 | 11481.44 |
| 2 | 1 | 2 | 1 | 1 | 0 | 3 | 1 | 11481.64 | 11481.64 |
| 2 | 1 | 2 | 1 | 1 | 0 | 3 | 0 | 11482.05 | 11482.06 |
| 3 | 1 | 3 | 3 | 2 | 1 | 3 | 3 | 12208.08 | 12208.08 |
| 3 | 1 | 3 | 4 | 2 | 1 | 2 | 3 | 12208.73 | 12208.75 |
| 3 | 1 | 3 | 2 | 2 | 1 | 1 | 2 | 12209.63 | 12209.65 |
| 3 | 0 | 3 | 3 | 2 | 0 | 8 | 2 | 12861.56 | 12861.58 |
| 3 | 0 | 3 | 4 | 2 | 0 | 2 | 3 | 12861.75 | 12861.76 |
| 3 | 1 | 2 | 4 | 2 | 1 | 2 | 3 | 14000.27 | 14000.26 |
| 3 | 2 | 2 | 2 | 3 | 1 | 2 | 2 | 12678.34 | 12678.33 |
| 3 | 2 | 2 | 4 | 3 | 1 | 2 | 4 | 12678.56 | 12678.56 |
| 3 | 2 | 2 | 3 | 3 | 1 | 2 | 3 | 12679.23 | 12679.23 |
| 5 | 2 | 4 | 6 | 5 | 1 | 2 | 6 | 15554.75 | 15554.81 |
| 5 | 2 | 4 | 5 | 5 | 1 | 5 | 5 | 15555.67 | 15555.62 |
| 3 | 2 | 2 | 4 | 2 | 2 | 5 | 3 | 13151.59 | 13151.57 |
| 3 | 2 | 2 | 3 | 2 | 2 | 5 | 2 | 13151.75 | 13151.74 |
| 3 | 2 | 1 | 4 | 2 | 2 | 4 | 3 | 13440.83 | 13440.84 |
| 3 | 2 | 1 | 3 | 2 | 2 | 4 | 2 | 13441.2  | 13441.2  |
| 4 | 2 | 3 | 3 | 4 | 1 | 4 | 3 | 13951.48 | 13951.5  |
| 4 | 2 | 3 | 5 | 4 | 1 | 4 | 5 | 13951.7  | 13951.69 |
| 4 | 2 | 3 | 4 | 4 | 1 | 3 | 4 | 13952.45 | 13952.46 |
| 2 | 2 | 1 | 2 | 2 | 1 | 5 | 1 | 11735.2  | 11735.2  |
| 2 | 2 | 1 | 1 | 2 | 1 | 5 | 1 | 11735.48 | 11735.48 |
| 2 | 2 | 1 | 3 | 2 | 1 | 4 | 3 | 11735.75 | 11735.75 |
| 2 | 2 | 1 | 2 | 2 | 1 | 4 | 2 | 11736.22 | 11736.23 |
| 2 | 2 | 0 | 2 | 2 | 1 | 6 | 2 | 10011.7  | 10011.71 |
| 2 | 2 | 0 | 3 | 2 | 1 | 6 | 3 | 10012.61 | 10012.6  |
| 2 | 2 | 0 | 1 | 2 | 1 | 3 | 1 | 10013.11 | 10013.1  |
| 5 | 2 | 3 | 6 | 5 | 1 | 3 | 6 | 8998.359 | 8998.356 |
| 4 | 2 | 2 | 4 | 4 | 1 | 3 | 4 | 9045.578 | 9045.574 |
| 4 | 2 | 2 | 5 | 4 | 1 | 2 | 5 | 9045.813 | 9045.834 |
| 3 | 2 | 1 | 3 | 3 | 1 | 2 | 3 | 9452.625 | 9452.627 |
| 3 | 2 | 1 | 4 | 3 | 1 | 1 | 4 | 9453.188 | 9453.185 |
| 3 | 2 | 1 | 2 | 3 | 1 | 0 | 2 | 9453.391 | 9453.381 |
| 4 | 1 | 3 | 3 | 3 | 2 | 0 | 2 | 9475.594 | 9475.592 |
| 4 | 1 | 3 | 5 | 3 | 2 | 7 | 4 | 9475.813 | 9475.805 |
| 4 | 1 | 3 | 4 | 3 | 2 | 8 | 3 | 9476.625 | 9476.636 |

|   |   |   |   |   |   |   |   |          |          |
|---|---|---|---|---|---|---|---|----------|----------|
| 6 | 1 | 5 | 5 | 6 | 0 | 8 | 5 | 12683.72 | 12683.7  |
| 6 | 1 | 5 | 7 | 6 | 0 | 9 | 7 | 12683.97 | 12683.92 |
| 6 | 1 | 5 | 6 | 6 | 0 | 9 | 6 | 12685.23 | 12685.23 |

**Table S9:** Linelist of *st* 4-pentenenitrile from SPFIT.<sup>1</sup>

| J up | Ka up | Kc up | F up | J low | Ka low | Kc low | F low | Observed (MHz) | Calculated (MHz) |
|------|-------|-------|------|-------|--------|--------|-------|----------------|------------------|
| 3    | 1     | 3     | 3    | 2     | 1      | 2      | 3     | 9016.891       | 9016.88703       |
| 3    | 1     | 3     | 3    | 2     | 1      | 2      | 2     | 9017.563       | 9017.55223       |
| 3    | 1     | 3     | 4    | 2     | 1      | 2      | 3     | 9017.906       | 9017.90366       |
| 3    | 1     | 3     | 2    | 2     | 1      | 2      | 2     | 9018.922       | 9018.92497       |
| 3    | 0     | 3     | 3    | 2     | 0      | 2      | 3     | 9207.109       | 9207.09256       |
| 3    | 0     | 3     | 2    | 2     | 0      | 2      | 1     | 9208.172       | 9208.1573        |
| 3    | 0     | 3     | 4    | 2     | 0      | 2      | 3     | 9208.422       | 9208.39996       |
| 3    | 1     | 2     | 3    | 2     | 1      | 1      | 3     | 9404.438       | 9404.42711       |
| 3    | 1     | 2     | 3    | 2     | 1      | 1      | 2     | 9405.016       | 9405.02175       |
| 3    | 1     | 2     | 4    | 2     | 1      | 1      | 3     | 9405.375       | 9405.37057       |
| 3    | 1     | 2     | 2    | 2     | 1      | 1      | 2     | 9406.297       | 9406.2957        |
| 4    | 1     | 4     | 4    | 3     | 1      | 3      | 3     | 12022.578      | 12022.54259      |
| 4    | 1     | 4     | 5    | 3     | 1      | 3      | 4     | 12022.688      | 12022.69951      |
| 4    | 0     | 4     | 4    | 3     | 0      | 3      | 4     | 12272.125      | 12272.10289      |
| 4    | 0     | 4     | 5    | 3     | 0      | 3      | 4     | 12273.438      | 12273.44066      |
| 4    | 0     | 4     | 3    | 3     | 0      | 3      | 3     | 12275.125      | 12275.09224      |
| 4    | 2     | 3     | 5    | 3     | 2      | 2      | 4     | 12282.25       | 12282.23768      |
| 4    | 2     | 2     | 4    | 3     | 2      | 1      | 3     | 12291.094      | 12291.1205       |
| 4    | 2     | 2     | 5    | 3     | 2      | 1      | 4     | 12291.641      | 12291.65449      |
| 5    | 1     | 5     | 6    | 4     | 1      | 4      | 5     | 15026.609      | 15026.60044      |
| 5    | 0     | 5     | 6    | 4     | 0      | 4      | 5     | 15334.719      | 15334.73063      |
| 5    | 2     | 3     | 5    | 4     | 2      | 2      | 4     | 15370.047      | 15370.07063      |
| 5    | 2     | 3     | 6    | 4     | 2      | 2      | 5     | 15370.359      | 15370.34956      |
| 5    | 1     | 4     | 6    | 4     | 1      | 3      | 5     | 15672.297      | 15672.29881      |
| 6    | 1     | 6     | 6    | 5     | 1      | 5      | 5     | 18029.297      | 18029.32318      |

|   |   |   |   |   |   |   |   |           |            |
|---|---|---|---|---|---|---|---|-----------|------------|
| 6 | 0 | 6 | 7 | 5 | 0 | 5 | 6 | 18391.313 | 18391.3423 |
|---|---|---|---|---|---|---|---|-----------|------------|

**Table S10:** Linelist of *sg*- 4-pentenenitrile from SPFIT.<sup>1</sup>

| J up | Ka up | Kc up | F up | J low | Ka low | Kc low | F low | Observed (MHz) | Calculated (MHz) |
|------|-------|-------|------|-------|--------|--------|-------|----------------|------------------|
| 1    | 1     | 1     | 1    | 0     | 0      | 0      | 1     | 7963.547       | 7963.536         |
| 1    | 1     | 1     | 2    | 0     | 0      | 0      | 1     | 7963.781       | 7963.766         |
| 2    | 1     | 2     | 2    | 1     | 1      | 1      | 2     | 8693.984       | 8693.995         |
| 2    | 1     | 2     | 2    | 1     | 1      | 1      | 1     | 8694.203       | 8694.225         |
| 2    | 1     | 2     | 3    | 1     | 1      | 1      | 2     | 8694.453       | 8694.458         |
| 4    | 2     | 2     | 5    | 4     | 1      | 3      | 5     | 9118.094       | 9118.109         |
| 2    | 0     | 2     | 3    | 1     | 0      | 1      | 2     | 9183.125       | 9183.102         |
| 2    | 0     | 2     | 1    | 1     | 0      | 1      | 1     | 9183.438       | 9183.452         |
| 3    | 2     | 1     | 4    | 3     | 1      | 2      | 4     | 9545.781       | 9545.8           |
| 2    | 1     | 1     | 1    | 1     | 1      | 0      | 1     | 9796.875       | 9796.878         |
| 2    | 1     | 1     | 2    | 1     | 1      | 0      | 1     | 9797.266       | 9797.262         |
| 2    | 1     | 1     | 3    | 1     | 1      | 0      | 2     | 9797.453       | 9797.447         |
| 2    | 1     | 1     | 2    | 1     | 1      | 0      | 2     | 9797.688       | 9797.694         |
| 2    | 1     | 1     | 1    | 1     | 1      | 0      | 0     | 9797.969       | 9797.958         |
| 3    | 0     | 3     | 4    | 2     | 1      | 2      | 3     | 10770.58       | 10770.63         |
| 2    | 1     | 2     | 2    | 1     | 0      | 1      | 1     | 12034.97       | 12034.97         |
| 2    | 1     | 2     | 3    | 1     | 0      | 1      | 2     | 12035.23       | 12035.23         |
| 2    | 1     | 2     | 1    | 1     | 0      | 1      | 1     | 12035.67       | 12035.69         |
| 3    | 0     | 3     | 4    | 2     | 0      | 2      | 3     | 13622.73       | 13622.75         |
| 3    | 2     | 2     | 3    | 2     | 2      | 1      | 2     | 13868.73       | 13868.72         |
| 3    | 2     | 2     | 4    | 2     | 2      | 1      | 3     | 13868.97       | 13868.94         |
| 3    | 1     | 3     | 3    | 2     | 0      | 2      | 3     | 15855.84       | 15855.85         |
| 3    | 1     | 3     | 3    | 2     | 0      | 2      | 2     | 15856.13       | 15856.11         |
| 3    | 1     | 3     | 4    | 2     | 0      | 2      | 3     | 15856.42       | 15856.4          |

**Figure S3:** The Boltzmann plot for (a) *syn* and (b) *eclipsed* 3-pentenenitrile. The rotational temperature

$$W = \frac{4\pi^2 \omega_0^2 S \mu_i^2 g_l g_l \epsilon N_{tot}}{c \sqrt{\alpha} k T_{rot}} e^{\frac{-E_l}{kT_{rot}}}$$

calculated using the equation:  $T = \frac{E_l}{k \ln\left(\frac{4\pi^2 \omega_0^2 S \mu_i^2 g_l g_l \epsilon N_{tot}}{c \sqrt{\alpha} k T_{rot} W}\right)}$ , are shown in the respective plots.<sup>3</sup> The errors on the rotational temperatures were derived from the best-fit plot based on the scatter in the intensities within the set of transitions rather than based on errors from multiple measurements of each rotational transition.

(a) *Syn* 3-pentenenitrile

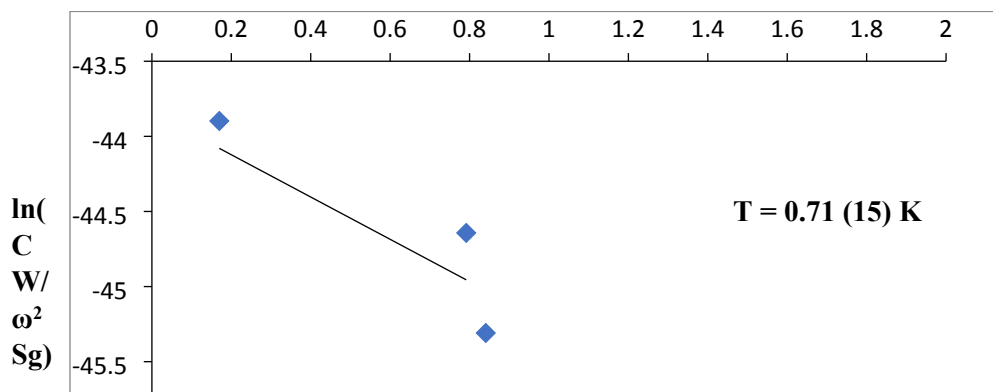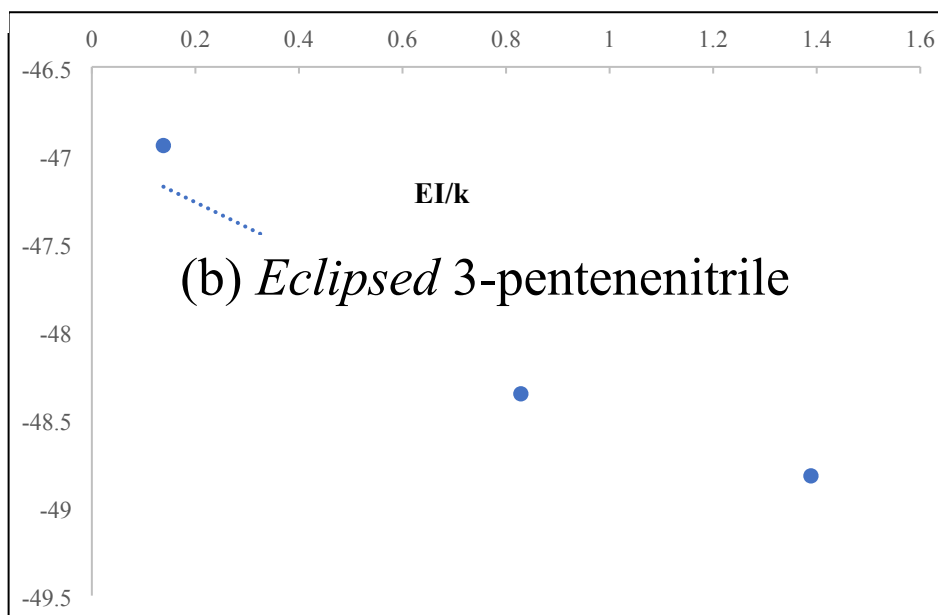

ln(  
C  
W/  
 $\omega^2$   
Sg)

T = 0.70 (11) K

EI/k

**Figure S4:** The Boltzmann plot for (a) *eg+*, (b) *et*, (c) *eg-*, (d) *st* and (e) *sg-* 4-pentenenitrile. The

$$W = \frac{4\pi^2 \omega_0^2 S \mu_i^2 g_l g_l \epsilon N_{tot}}{c \sqrt{a} k T_{rot}} e^{\frac{-E_l}{kT_{rot}}}$$

rotational temperature calculated using the equation: , are shown in the respective plots.<sup>3</sup> The errors on the rotational temperatures were derived from the best-fit plot based on the scatter in the intensities within the set of transitions rather than based on errors from multiple measurements of each rotational transition.

(a) *eg+* 4-Pentenenitrile

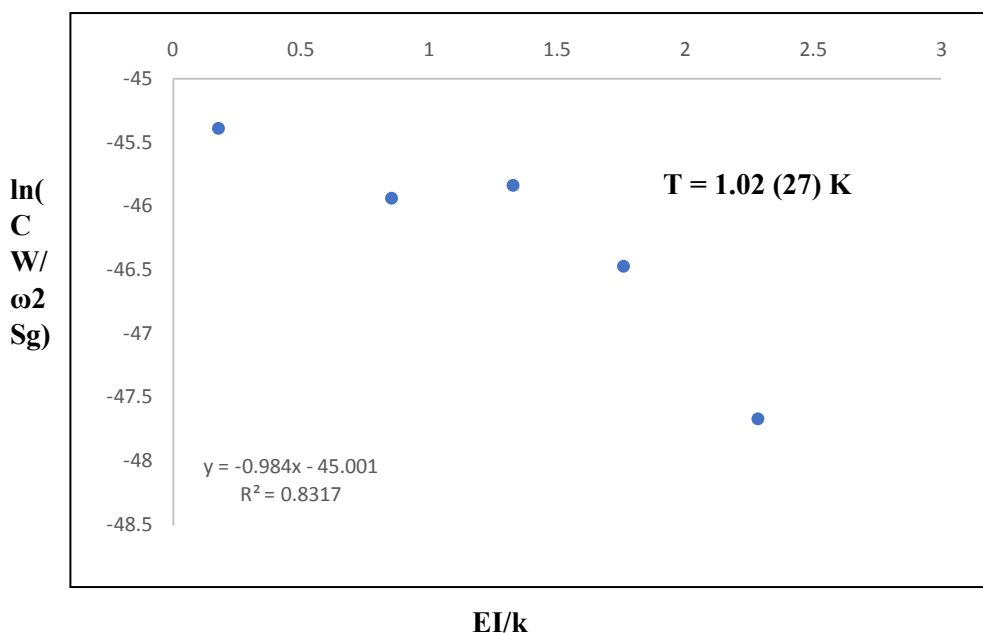

(b) *et* 4-pentenenitrile

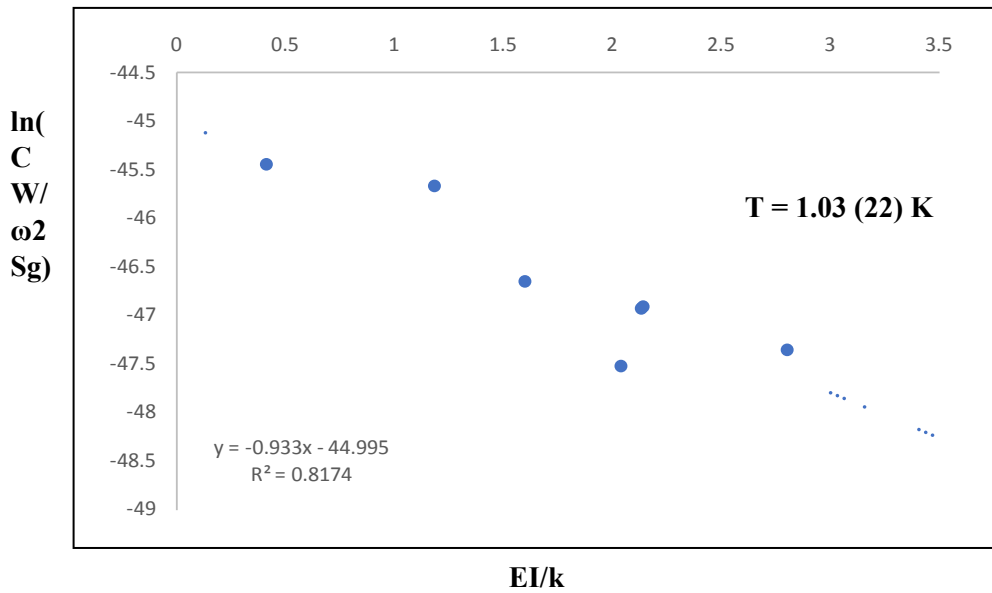

(c) *eg*- 4-Pentenenitrile

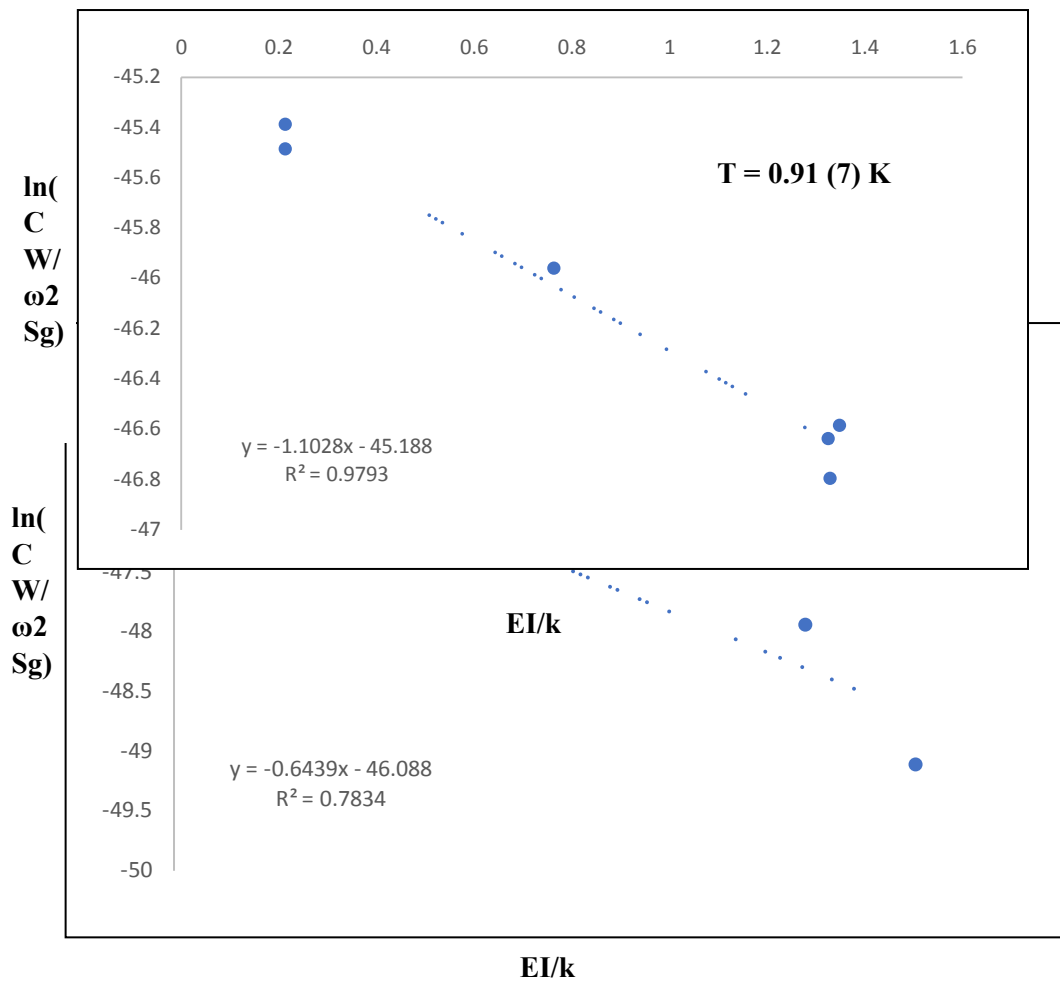

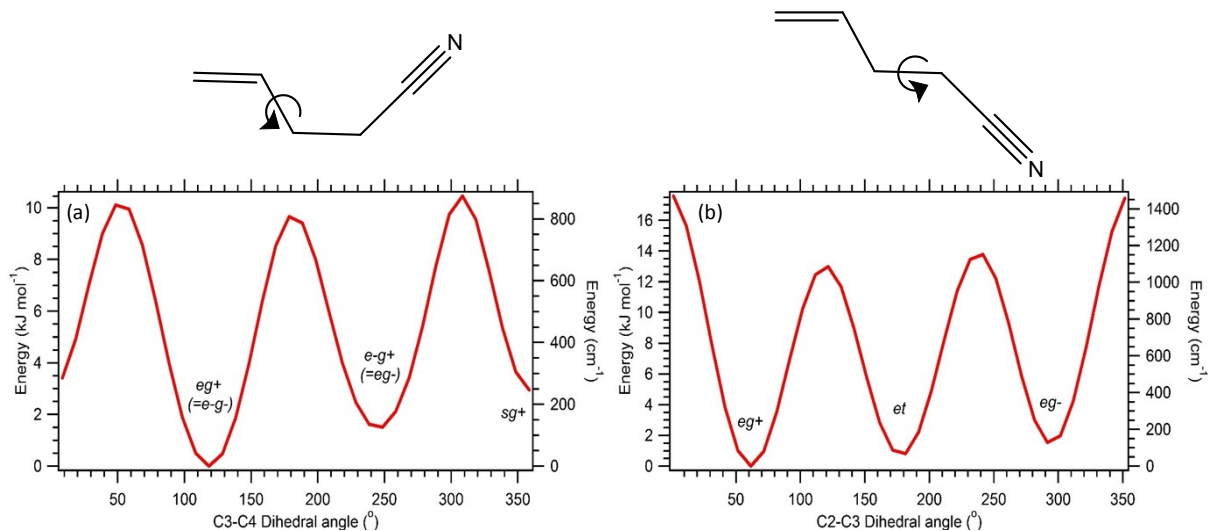

**Figure S5:** Relaxed potential energy scans for 4-PN of the dihedral angle indicated above it, calculated at the dispersion corrected DFT B3LYP-GD3BJ/Def2TZVP level of theory. (a) The C3-C4 dihedral with C2-C3 in gauche(+) ( $xg+$ ), and (b) the C2-C3 dihedral with C3-C4 in its eclipsed configuration ( $ex$ ). The flexible dihedral angle was rotated in  $10^\circ$  steps.

## References

- <sup>1</sup> M. Pickett, *J. Mol. Spectrosc.*, 1991, **148**, 371.
- <sup>2</sup> H. Hartwig and H. Dreizler, *Z. Naturforsch.*, 1996, **51a**, 923.
- <sup>3</sup> J. M. Oldham, C. Abeysekera, B. Joalland, L. N. Zack, K. Prozument, I. R. Sims, G. B. Park, R. W. Field, and A. G. Suits, *J. Chem. Phys.*, 2014, **141**, 154202; C. H. Townes, and A. L. Schawlow, *Microwave Spectroscopy*, Dover Publications, New York, 1955.
